# Supplementary material
Source: publisher figshare collection journal article supplement (https://gsajournals.figshare.com/ndownloader/files/22867301)
Supplement: Supplementary file 1 [file 22867301]

**Figure S1. Agarose mold setup for *Oncopeltus* embryo injection.** A) Top part of mold; this is placed inside the bottom part (B) after agar is poured, creating grooves in the agar sheet; B) Bottom part of agar mold; C) Agar sheet made using mold; D) *Oncopeltus* embryos lined up for injection in agar sheet; E) Close-up from D showing *Oncopeltus* embryos aligned longitudinally in the grooves.

**Figure S2. Percent of G1s genotyped heterozygous from each G0 line.** The G0 lines from which adult G1 progeny were obtained are displayed along the x-axis; the percent of their progeny which were screened and genotyped heterozygous is shown along the y-axis. The number of G1s which were directly screened from each G0 line is displayed within each bar.

**File S1.** Sequence alignment used for phylogenetic analysis.

**File S2.** Newick-formatted text file for phylogenetictree estimation.

**File S3.** STL file for bottom part of agar mold.

**File S4.** STL file for top part of agar mold.
